# Supplementary material for: Clinical phenotype-based gene prioritization: an initial study using semantic similarity and the human phenotype ontology
Source: Springer Nature journal article supplement (doi:10.1186/1471-2105-15-248), 2014-07-21
Supplement: 12859_2014_6518_MOESM1_ESM.pdf [file 12859_2014_6518_MOESM1_ESM.pdf]

## Appendix Simulated Diseases

OMIM: Disease ID: 101000, disease name: neurofibromatosis, type ii, causative gene: NF2

| HPO Term ID | Gender | Penetrance |
|-------------|--------|------------|
| HP:0009589  | N/A    | 0.85       |
| HP:0007935  | N/A    | 0.72       |
| HP:0009593  | N/A    | 0.68       |
| HP:0002858  | N/A    | 0.45       |
| HP:0007876  | N/A    | 0.41       |
| HP:0009595  | N/A    | 0.27       |
| HP:0000360  | N/A    | 0.1        |
| HP:0009594  | N/A    | 0.09       |
| HP:0001251  | N/A    | 0.08       |
| HP:0009590  | N/A    | 0.06       |
| HP:0009592  | N/A    | 0.04       |
| HP:0002888  | N/A    | 0.025      |

OMIM: Disease ID: 107480, disease name: townes-brocks syndrome, causative gene: SALL1

| HPO Term ID | Gender | Penetrance |
|-------------|--------|------------|
| HP:0001177  | N/A    | 0.5        |
| HP:0001199  | N/A    | 0.5        |
| HP:0000384  | N/A    | 0.5        |
| HP:0001864  | N/A    | 0.5        |
| HP:0002023  | N/A    | 0.4696     |
| HP:0000003  | N/A    | 0.075      |
| HP:0000083  | N/A    | 0.075      |
| HP:0000110  | N/A    | 0.075      |
| HP:0000089  | N/A    | 0.075      |
| HP:0000076  | N/A    | 0.075      |

OMIM: Disease ID: 108120, disease name: arthrogryposis, distal, type 1a, causative gene: TPM2

| HPO Term ID | Gender | Penetrance |
|-------------|--------|------------|
| HP:0001838  | N/A    | 0.88       |
| HP:0001374  | N/A    | 0.38       |
| HP:0003184  | N/A    | 0.38       |
| HP:0003273  | N/A    | 0.38       |
| HP:0001848  | N/A    | 0.33       |
| HP:0001188  | N/A    | 0.25       |
| HP:0001762  | N/A    | 0.25       |
| HP:0001181  | N/A    | 0.25       |
| HP:0001032  | N/A    | 0.25       |
| HP:0009742  | N/A    | 0.17       |
| HP:0000954  | N/A    | 0.075      |
| HP:0000211  | N/A    | 0.075      |
| HP:0000028  | N/A    | 0.075      |

OMIM: Disease ID: 113620, disease name: branchiooculofacial syndrome, causative gene: TFAP2A

| HPO Term ID | Gender | Penetrance |
|-------------|--------|------------|
| HP:0002162  | N/A    | 0.92       |
| HP:0000368  | N/A    | 0.9047     |
| HP:0000579  | N/A    | 0.7435     |
| HP:0000470  | N/A    | 0.66       |
| HP:0002987  | N/A    | 0.64       |
| HP:0000506  | N/A    | 0.58       |
| HP:0001057  | N/A    | 0.57       |
| HP:0000987  | N/A    | 0.57       |
| HP:0000545  | N/A    | 0.57       |
| HP:0000508  | N/A    | 0.57       |
| HP:0000639  | N/A    | 0.57       |
| HP:0000945  | N/A    | 0.51       |
| HP:0000582  | N/A    | 0.48       |
| HP:0000568  | N/A    | 0.44       |
| HP:0000528  | N/A    | 0.44       |
| HP:0008559  | N/A    | 0.43       |
| HP:0001256  | N/A    | 0.4166     |
| HP:0000405  | N/A    | 0.3684     |
| HP:0000047  | M      | 0.33       |
| HP:0000486  | N/A    | 0.3055     |
| HP:0002020  | N/A    | 0.3        |
| HP:0000545  | N/A    | 0.2812     |
| HP:0000508  | N/A    | 0.2777     |
| HP:0000518  | N/A    | 0.2424     |
| HP:0002216  | N/A    | 0.2368     |
| HP:0000268  | N/A    | 0.2307     |
| HP:0001250  | N/A    | 0.23       |
| HP:0008606  | N/A    | 0.15       |
| HP:0000407  | N/A    | 0.075      |

|            |     |       |
|------------|-----|-------|
| HP:0000104 | N/A | 0.075 |
| HP:0001177 | N/A | 0.075 |
| HP:0000196 | N/A | 0.075 |
| HP:0002335 | N/A | 0.075 |
| HP:0002211 | N/A | 0.075 |
| HP:0000455 | N/A | 0.075 |
| HP:0000175 | N/A | 0.075 |
| HP:0000252 | N/A | 0.075 |
| HP:0002020 | N/A | 0.075 |
| HP:0005217 | N/A | 0.075 |
| HP:0004785 | N/A | 0.075 |
| HP:0002021 | N/A | 0.075 |
| HP:0004464 | N/A | 0.075 |

OMIM: Disease ID: 113650, disease name: branchiootorenal syndrome, causative gene: EYA1

| HPO Term ID | Gender | Penetrance |
|-------------|--------|------------|
| HP:0009795  | N/A    | 0.5        |
| HP:0009796  | N/A    | 0.5        |
| HP:0000378  | N/A    | 0.45       |
| HP:0000402  | N/A    | 0.3        |
| HP:0000799  | N/A    | 0.1        |
| HP:0000691  | N/A    | 0.075      |
| HP:0009798  | N/A    | 0.075      |
| HP:0000384  | N/A    | 0.075      |
| HP:0000175  | N/A    | 0.075      |
| HP:0000156  | N/A    | 0.075      |
| HP:0000193  | N/A    | 0.075      |
| HP:0002060  | N/A    | 0.075      |
| HP:0009797  | N/A    | 0.075      |
| HP:0001374  | N/A    | 0.075      |

OMIM: Disease ID: 119500, disease name: popliteal pterygium syndrome, causative gene: IRF6

| HPO Term ID | Gender | Penetrance |
|-------------|--------|------------|
| HP:0000175  | N/A    | 0.9298     |
| HP:0009756  | N/A    | 0.5789     |
| HP:0000196  | N/A    | 0.4561     |
| HP:0009754  | N/A    | 0.4035     |
| HP:0000046  | M      | 0.3684     |
| HP:0000048  | M      | 0.3684     |
| HP:0000028  | M      | 0.3684     |
| HP:0000013  | F      | 0.3684     |
| HP:0000726  | F      | 0.3684     |
| HP:0000059  | F      | 0.3684     |
| HP:0009758  | N/A    | 0.3333     |
| HP:0009755  | N/A    | 0.1754     |
| HP:0001762  | N/A    | 0.1403     |
| HP:0009757  | N/A    | 0.0877     |
| HP:0003298  | N/A    | 0.075      |

OMIM: Disease ID: 121050, disease name: arthrogryposis, causative gene: FBN2

| HPO Term ID | Gender | Penetrance |
|-------------|--------|------------|
| HP:0001519  | N/A    | 0.86       |
| HP:0001166  | N/A    | 0.86       |
| HP:0002987  | N/A    | 0.86       |
| HP:0008962  | N/A    | 0.65       |
| HP:0001762  | N/A    | 0.32       |
| HP:0000248  | N/A    | 0.29       |
| HP:0000268  | N/A    | 0.29       |
| HP:0003273  | N/A    | 0.26       |
| HP:0001653  | N/A    | 0.25       |
| HP:0001840  | N/A    | 0.25       |
| HP:0000545  | N/A    | 0.075      |
| HP:0002616  | N/A    | 0.075      |
| HP:0001631  | N/A    | 0.075      |
| HP:0001634  | N/A    | 0.075      |
| HP:0001629  | N/A    | 0.075      |
| HP:0002999  | N/A    | 0.075      |



OMIM: Disease ID: 122470, disease name: cornelia de lange syndrome, causative gene: NIPBL

| HPO Term ID | Gender | Penetrance |
|-------------|--------|------------|
| HP:0002750  | N/A    | 1.0        |
| HP:0000664  | N/A    | 0.98       |
| HP:0000343  | N/A    | 0.94       |
| HP:0000219  | N/A    | 0.94       |
| HP:0002714  | N/A    | 0.94       |
| HP:0002983  | N/A    | 0.93       |
| HP:0002162  | N/A    | 0.92       |
| HP:0004691  | N/A    | 0.86       |
| HP:0000156  | N/A    | 0.86       |
| HP:0000463  | N/A    | 0.85       |
| HP:0001007  | N/A    | 0.78       |
| HP:0001612  | N/A    | 0.74       |
| HP:0000470  | N/A    | 0.66       |
| HP:0002987  | N/A    | 0.64       |
| HP:0008721  | M      | 0.57       |
| HP:0000545  | N/A    | 0.57       |
| HP:0000508  | N/A    | 0.57       |
| HP:0000639  | N/A    | 0.57       |
| HP:0000965  | N/A    | 0.56       |
| HP:0000954  | N/A    | 0.51       |
| HP:0001551  | N/A    | 0.5        |
| HP:0002557  | N/A    | 0.5        |
| HP:0000047  | N/A    | 0.33       |
| HP:0002020  | N/A    | 0.3        |
| HP:0001180  | N/A    | 0.27       |
| HP:0001249  | N/A    | 0.25       |
| HP:0000879  | N/A    | 0.25       |
| HP:0005815  | N/A    | 0.25       |
| HP:0003083  | N/A    | 0.25       |

|            |     |       |
|------------|-----|-------|
| HP:0003997 | N/A | 0.25  |
| HP:0001250 | N/A | 0.23  |
| HP:0000588 | N/A | 0.075 |
| HP:0000483 | N/A | 0.075 |
| HP:0000648 | N/A | 0.075 |
| HP:0001629 | N/A | 0.075 |
| HP:0002984 | N/A | 0.075 |
| HP:0000486 | N/A | 0.075 |
| HP:0000520 | N/A | 0.075 |
| HP:0001873 | N/A | 0.075 |
| HP:0000059 | N/A | 0.075 |
| HP:0002036 | N/A | 0.075 |
| HP:0000776 | N/A | 0.075 |
| HP:0000175 | N/A | 0.075 |
| HP:0000482 | N/A | 0.075 |
| HP:0002021 | N/A | 0.075 |
| HP:0000453 | N/A | 0.075 |
| HP:0000023 | N/A | 0.075 |
| HP:0002020 | N/A | 0.075 |
| HP:0005217 | N/A | 0.075 |
| HP:0004785 | N/A | 0.075 |

OMIM: Disease ID: 131300, disease name: camurati-engelmann disease, causative gene: TGFB1

| HPO Term ID | Gender | Penetrance |
|-------------|--------|------------|
| HP:0005791  | N/A    | 0.9425     |
| HP:0001533  | N/A    | 0.9        |
| HP:0009763  | N/A    | 0.6847     |
| HP:0002694  | N/A    | 0.5423     |
| HP:0004396  | N/A    | 0.5        |
| HP:0003202  | N/A    | 0.5        |
| HP:0003388  | N/A    | 0.4444     |
| HP:0002315  | N/A    | 0.4090     |
| HP:0001324  | N/A    | 0.3913     |
| HP:0001002  | N/A    | 0.2127     |
| HP:0000823  | N/A    | 0.1666     |

OMIM: Disease ID: 142900, disease name: holt-oram syndrome, causative gene: TBX5

| HPO Term ID | Gender | Penetrance |
|-------------|--------|------------|
| HP:0001631  | N/A    | 0.4146     |
| HP:0002984  | N/A    | 0.3780     |
| HP:0001629  | N/A    | 0.1463     |
| HP:0001643  | N/A    | 0.075      |
| HP:0002943  | N/A    | 0.075      |
| HP:0009751  | N/A    | 0.075      |

OMIM: Disease ID: 147920, disease name: kabuki syndrome 1, causative gene: MLL2

| HPO Term ID | Gender | Penetrance |
|-------------|--------|------------|
| HP:0000637  | N/A    | 0.95       |
| HP:0007655  | N/A    | 0.9        |
| HP:0000437  | N/A    | 0.71       |
| HP:0000175  | N/A    | 0.44       |
| HP:0000156  | N/A    | 0.44       |
| HP:0000252  | N/A    | 0.25       |
| HP:0000486  | N/A    | 0.22       |
| HP:0000592  | N/A    | 0.21       |
| HP:0001374  | N/A    | 0.11       |
| HP:0000508  | N/A    | 0.11       |
| HP:0001250  | N/A    | 0.08       |

OMIM: Disease ID: 153400, disease name: lymphedema-distichiasis syndrome,  
causative gene: FOXC2

| HPO Term ID | Gender | Penetrance |
|-------------|--------|------------|
| HP:0009743  | N/A    | 1.0        |
| HP:0003550  | N/A    | 0.66       |
| HP:0000508  | N/A    | 0.075      |
| HP:0000175  | N/A    | 0.075      |
| HP:0000465  | N/A    | 0.075      |
| HP:0000204  | N/A    | 0.04       |

OMIM: Disease ID: 154500, disease name: treacher collins syndrome, causative gene: TCOF1

| HPO Term ID | Gender | Penetrance |
|-------------|--------|------------|
| HP:0000272  | N/A    | 0.89       |
| HP:0000494  | N/A    | 0.89       |
| HP:0000347  | N/A    | 0.78       |
| HP:0000377  | N/A    | 0.77       |
| HP:0000652  | N/A    | 0.69       |
| HP:0000572  | N/A    | 0.37       |
| HP:0000185  | N/A    | 0.32       |
| HP:0000175  | N/A    | 0.28       |
| HP:0009554  | N/A    | 0.26       |
| HP:0009555  | N/A    | 0.075      |
| HP:0000160  | N/A    | 0.075      |
| HP:0000508  | N/A    | 0.075      |
| HP:0000197  | N/A    | 0.075      |
| HP:0000636  | N/A    | 0.075      |
| HP:0000486  | N/A    | 0.075      |
| HP:0000028  | N/A    | 0.075      |
| HP:0007678  | N/A    | 0.075      |
| HP:0000384  | N/A    | 0.075      |
| HP:0000453  | N/A    | 0.075      |
| HP:0002564  | N/A    | 0.075      |
| HP:0001249  | N/A    | 0.05       |

OMIM: Disease ID: 161200, disease name: nail-patella syndrome, causative gene: LMX1B

| HPO Term ID | Gender | Penetrance |
|-------------|--------|------------|
| HP:0001598  | N/A    | 0.9831     |
| HP:0001798  | N/A    | 0.9831     |
| HP:0001032  | N/A    | 0.9579     |
| HP:0001377  | N/A    | 0.6958     |
| HP:0009780  | N/A    | 0.68       |
| HP:0001763  | N/A    | 0.6440     |
| HP:0009781  | N/A    | 0.5378     |
| HP:0000767  | N/A    | 0.3589     |
| HP:0002650  | N/A    | 0.2285     |
| HP:0001762  | N/A    | 0.1885     |
| HP:0009760  | N/A    | 0.1219     |
| HP:0000501  | N/A    | 0.0963     |
| HP:0009788  | N/A    | 0.075      |
| HP:0009785  | N/A    | 0.075      |
| HP:0009783  | N/A    | 0.075      |
| HP:0005255  | N/A    | 0.075      |



OMIM: Disease ID: 162200, disease name: neurofibromatosis, type i, causative gene: NF1

| HPO Term ID | Gender | Penetrance |
|-------------|--------|------------|
| HP:0009737  | N/A    | 0.95       |
| HP:0001328  | N/A    | 0.3        |
| HP:0009732  | N/A    | 0.3        |
| HP:0002650  | N/A    | 0.05       |
| HP:0009736  | N/A    | 0.04       |
| HP:0001920  | N/A    | 0.015      |
| HP:0002521  | N/A    | 0.015      |
| HP:0009734  | N/A    | 0.015      |
| HP:0002857  | N/A    | 0.015      |
| HP:0002410  | N/A    | 0.015      |
| HP:0002666  | N/A    | 0.01       |
| HP:0002858  | N/A    | 0.01       |
| HP:0000501  | N/A    | 0.007      |

OMIM: Disease ID: 175700, disease name: greig cephalopolysyndactyly syndrome, causative gene: GLI3

| HPO Term ID | Gender | Penetrance |
|-------------|--------|------------|
| HP:0001162  | N/A    | 0.78       |
| HP:0000348  | N/A    | 0.7        |
| HP:0000256  | N/A    | 0.52       |
| HP:0000316  | N/A    | 0.25       |
| HP:0001256  | N/A    | 0.075      |
| HP:0001537  | N/A    | 0.075      |
| HP:0000494  | N/A    | 0.075      |
| HP:0001274  | N/A    | 0.075      |
| HP:0004303  | N/A    | 0.075      |
| HP:0005616  | N/A    | 0.075      |
| HP:0001830  | N/A    | 0.075      |
| HP:0001007  | N/A    | 0.075      |
| HP:0000238  | N/A    | 0.075      |
| HP:0000023  | N/A    | 0.075      |
| HP:0001250  | N/A    | 0.075      |
| HP:0001363  | N/A    | 0.075      |
| HP:0000047  | N/A    | 0.075      |
| HP:0000028  | N/A    | 0.075      |

OMIM: Disease ID: 176450, disease name: currarino syndrome, causative gene: MNX1

| HPO Term ID | Gender | Penetrance |
|-------------|--------|------------|
| HP:0009790  | N/A    | 0.75       |
| HP:0007293  | N/A    | 0.4975     |
| HP:0000143  | N/A    | 0.33       |
| HP:0009793  | N/A    | 0.33       |
| HP:0000010  | N/A    | 0.33       |
| HP:0009791  | N/A    | 0.22       |
| HP:0004796  | N/A    | 0.1609     |
| HP:0002144  | N/A    | 0.1414     |
| HP:0001287  | N/A    | 0.1121     |
| HP:0009789  | N/A    | 0.1121     |
| HP:0000076  | N/A    | 0.075      |
| HP:0000813  | N/A    | 0.075      |

OMIM: Disease ID: 180849, disease name: rubinstein-taybi syndrome 1, causative gene: CREBBP

| HPO Term ID | Gender | Penetrance |
|-------------|--------|------------|
| HP:0001249  | N/A    | 1.0        |
| HP:0000444  | N/A    | 0.9        |
| HP:0000494  | N/A    | 0.88       |
| HP:0000527  | N/A    | 0.87       |
| HP:0002317  | N/A    | 0.85       |
| HP:0000377  | N/A    | 0.84       |
| HP:0000028  | M      | 0.78       |
| HP:0000574  | N/A    | 0.76       |
| HP:0001007  | N/A    | 0.75       |
| HP:0002750  | N/A    | 0.74       |
| HP:0001763  | N/A    | 0.72       |
| HP:0004411  | N/A    | 0.71       |
| HP:0000486  | N/A    | 0.69       |
| HP:0002353  | N/A    | 0.57       |
| HP:0000286  | N/A    | 0.55       |
| HP:0003298  | N/A    | 0.47       |
| HP:0000579  | N/A    | 0.43       |
| HP:0002650  | N/A    | 0.42       |
| HP:0002162  | N/A    | 0.42       |
| HP:0000260  | N/A    | 0.41       |
| HP:0000252  | N/A    | 0.35       |
| HP:0001631  | N/A    | 0.33       |
| HP:0001629  | N/A    | 0.33       |
| HP:0001643  | N/A    | 0.33       |
| HP:0008107  | N/A    | 0.33       |
| HP:0001135  | N/A    | 0.31       |
| HP:0005306  | N/A    | 0.25       |
| HP:0000294  | N/A    | 0.24       |
| HP:0000270  | N/A    | 0.24       |

|            |     |       |
|------------|-----|-------|
| HP:0001250 | N/A | 0.23  |
| HP:0000663 | N/A | 0.22  |
| HP:0002236 | N/A | 0.2   |
| HP:0000954 | N/A | 0.075 |
| HP:0002700 | N/A | 0.075 |
| HP:0000508 | N/A | 0.075 |
| HP:0000049 | M   | 0.075 |
| HP:0000047 | M   | 0.075 |
| HP:0000501 | N/A | 0.075 |
| HP:0002697 | N/A | 0.075 |
| HP:0002999 | N/A | 0.075 |
| HP:0000518 | N/A | 0.075 |

OMIM: Disease ID: 182212, disease name: shprintzen-goldberg craniosynostosis syndrome, causative gene: SKI

| HPO Term ID | Gender | Penetrance |
|-------------|--------|------------|
| HP:0001166  | N/A    | 0.9189     |
| HP:0000368  | N/A    | 0.8648     |
| HP:0000494  | N/A    | 0.8378     |
| HP:0000156  | N/A    | 0.8108     |
| HP:0000268  | N/A    | 0.7567     |
| HP:0000316  | N/A    | 0.7567     |
| HP:0002650  | N/A    | 0.6216     |
| HP:0000377  | N/A    | 0.5405     |
| HP:0000023  | N/A    | 0.5135     |
| HP:0001363  | N/A    | 0.4864     |
| HP:0000486  | N/A    | 0.4594     |
| HP:0000508  | N/A    | 0.4324     |
| HP:0000327  | N/A    | 0.4324     |
| HP:0001537  | N/A    | 0.3513     |
| HP:0001634  | N/A    | 0.3513     |
| HP:0001762  | N/A    | 0.3513     |
| HP:0000938  | N/A    | 0.2702     |
| HP:0000260  | N/A    | 0.2432     |
| HP:0000586  | N/A    | 0.2432     |
| HP:0000545  | N/A    | 0.2307     |
| HP:0000252  | N/A    | 0.1621     |
| HP:0002870  | N/A    | 0.1621     |
| HP:0000895  | N/A    | 0.1621     |
| HP:0003083  | N/A    | 0.1351     |
| HP:0009023  | N/A    | 0.1351     |
| HP:0005815  | N/A    | 0.1351     |
| HP:0000405  | N/A    | 0.1351     |
| HP:0002857  | N/A    | 0.1081     |
| HP:0003016  | N/A    | 0.1081     |

|            |     |        |
|------------|-----|--------|
| HP:0002020 | N/A | 0.1081 |
| HP:0000028 | N/A | 0.1081 |

OMIM: Disease ID: 191100, disease name: tuberous sclerosis 1, causative gene: TSC1

| HPO Term ID | Gender | Penetrance |
|-------------|--------|------------|
| HP:0009716  | N/A    | 0.95       |
| HP:0000717  | N/A    | 0.93       |
| HP:0009720  | N/A    | 0.85       |
| HP:0009719  | N/A    | 0.82       |
| HP:0001249  | N/A    | 0.53       |
| HP:0006772  | N/A    | 0.52       |
| HP:0009729  | N/A    | 0.5        |
| HP:0001482  | N/A    | 0.5        |
| HP:0009554  | N/A    | 0.5        |
| HP:0009722  | N/A    | 0.48       |
| HP:0009724  | N/A    | 0.32       |
| HP:0009721  | N/A    | 0.31       |
| HP:0009727  | N/A    | 0.13       |
| HP:0009717  | N/A    | 0.1        |
| HP:0005584  | N/A    | 0.05       |



OMIM: Disease ID: 193700, disease name: arthrogryposis, distal, type 2a, causative gene: MYH3

| HPO Term ID | Gender | Penetrance |
|-------------|--------|------------|
| HP:0000346  | N/A    | 1.0        |
| HP:0002751  | N/A    | 0.84       |
| HP:0003273  | N/A    | 0.73       |
| HP:0001762  | N/A    | 0.59       |
| HP:0000252  | N/A    | 0.44       |
| HP:0000506  | N/A    | 0.25       |
| HP:0000490  | N/A    | 0.25       |
| HP:0000343  | N/A    | 0.25       |
| HP:0000486  | N/A    | 0.25       |
| HP:0000581  | N/A    | 0.25       |
| HP:0001838  | N/A    | 0.25       |
| HP:0000431  | N/A    | 0.25       |
| HP:0000430  | N/A    | 0.25       |
| HP:0003044  | N/A    | 0.25       |
| HP:0001181  | N/A    | 0.25       |
| HP:0000286  | N/A    | 0.25       |
| HP:0000023  | N/A    | 0.25       |
| HP:0001611  | N/A    | 0.25       |
| HP:0001250  | N/A    | 0.19       |
| HP:0002365  | N/A    | 0.075      |
| HP:0002365  | N/A    | 0.075      |
| HP:0003298  | N/A    | 0.075      |
| HP:0000508  | N/A    | 0.075      |
| HP:0000470  | N/A    | 0.075      |
| HP:0002827  | N/A    | 0.075      |
| HP:0001518  | N/A    | 0.075      |

OMIM: Disease ID: 216550, disease name: cohen syndrome, causative gene: VPS13B

| HPO Term ID | Gender | Penetrance |
|-------------|--------|------------|
| HP:0001249  | N/A    | 1.0        |
| HP:0001763  | N/A    | 0.97       |
| HP:0000252  | N/A    | 0.9032     |
| HP:0001182  | N/A    | 0.78       |
| HP:0001319  | N/A    | 0.56       |
| HP:0000545  | N/A    | 0.5        |
| HP:0000426  | N/A    | 0.5        |
| HP:0000444  | N/A    | 0.5        |
| HP:0000322  | N/A    | 0.5        |
| HP:0001135  | N/A    | 0.5        |
| HP:0000574  | N/A    | 0.5        |
| HP:0004283  | N/A    | 0.5        |
| HP:0000675  | N/A    | 0.5        |
| HP:0000494  | N/A    | 0.5        |
| HP:0000823  | N/A    | 0.4        |
| HP:0000505  | N/A    | 0.35       |
| HP:0001601  | N/A    | 0.33       |
| HP:0001518  | N/A    | 0.33       |

OMIM: Disease ID: 218600, disease name: baller-gerold syndrome, causative gene: RECQL4

| HPO Term ID | Gender | Penetrance |
|-------------|--------|------------|
| HP:0003031  | N/A    | 0.68       |
| HP:0000368  | N/A    | 0.64       |
| HP:0001249  | N/A    | 0.5        |
| HP:0000160  | N/A    | 0.32       |
| HP:0000494  | N/A    | 0.32       |
| HP:0000426  | N/A    | 0.32       |
| HP:0004425  | N/A    | 0.27       |
| HP:0003298  | N/A    | 0.075      |
| HP:0000486  | N/A    | 0.075      |
| HP:0000405  | N/A    | 0.075      |
| HP:0002996  | N/A    | 0.075      |
| HP:0000175  | N/A    | 0.075      |
| HP:0000545  | N/A    | 0.075      |
| HP:0000193  | N/A    | 0.075      |
| HP:0000902  | N/A    | 0.075      |
| HP:0006467  | N/A    | 0.075      |
| HP:0002126  | N/A    | 0.075      |
| HP:0000238  | N/A    | 0.075      |
| HP:0000286  | N/A    | 0.075      |
| HP:0001250  | N/A    | 0.075      |
| HP:0005201  | N/A    | 0.075      |
| HP:0000452  | N/A    | 0.075      |
| HP:0003065  | N/A    | 0.075      |
| HP:0005792  | N/A    | 0.075      |
| HP:0000430  | N/A    | 0.075      |
| HP:0000648  | N/A    | 0.075      |
| HP:0001274  | N/A    | 0.075      |

OMIM: Disease ID: 225750, disease name: aicardi-goutieres syndrome, causative gene: TREX1

| HPO Term ID | Gender | Penetrance |
|-------------|--------|------------|
| HP:0002062  | N/A    | 0.9855     |
| HP:0009709  | N/A    | 0.9393     |
| HP:0002135  | N/A    | 0.9275     |
| HP:0009704  | N/A    | 0.7846     |
| HP:0002071  | N/A    | 0.6086     |
| HP:0001433  | N/A    | 0.5652     |
| HP:0000639  | N/A    | 0.5238     |
| HP:0002448  | N/A    | 0.5        |
| HP:0002421  | N/A    | 0.5        |
| HP:0001250  | N/A    | 0.5        |
| HP:0007321  | N/A    | 0.5        |
| HP:0001332  | N/A    | 0.5        |
| HP:0000486  | N/A    | 0.2857     |
| HP:0009710  | N/A    | 0.2380     |
| HP:0004394  | N/A    | 0.1594     |
| HP:0001945  | N/A    | 0.1594     |

OMIM: Disease ID: 235730, disease name: mowat-wilson syndrome, causative gene: ZEB2

| HPO Term ID | Gender | Penetrance |
|-------------|--------|------------|
| HP:0001250  | N/A    | 0.9        |
| HP:0000252  | N/A    | 0.84       |
| HP:0000307  | N/A    | 0.5        |
| HP:0005274  | N/A    | 0.5        |
| HP:0000494  | N/A    | 0.5        |
| HP:0000508  | N/A    | 0.5        |
| HP:0000490  | N/A    | 0.5        |
| HP:0002019  | N/A    | 0.5        |
| HP:0000316  | N/A    | 0.5        |
| HP:0000431  | N/A    | 0.5        |
| HP:0000378  | N/A    | 0.5        |
| HP:0000612  | N/A    | 0.5        |
| HP:0000565  | N/A    | 0.5        |
| HP:0001274  | N/A    | 0.42       |
| HP:0003720  | N/A    | 0.33       |
| HP:0000048  | M      | 0.33       |
| HP:0000028  | M      | 0.33       |
| HP:0000047  | M      | 0.33       |
| HP:0000176  | N/A    | 0.075      |

OMIM: Disease ID: 236670, disease name: muscular dystrophy-dystroglycanopathy, causative gene: POMT1

| HPO Term ID | Gender | Penetrance |
|-------------|--------|------------|
| HP:0007260  | N/A    | 1.0        |
| HP:0007901  | N/A    | 1.0        |
| HP:0003741  | N/A    | 1.0        |
| HP:0002189  | N/A    | 0.95       |
| HP:0000238  | N/A    | 0.53       |
| HP:0000568  | N/A    | 0.53       |
| HP:0001305  | N/A    | 0.53       |
| HP:0002803  | N/A    | 0.43       |
| HP:0006891  | N/A    | 0.25       |
| HP:0000541  | N/A    | 0.25       |
| HP:0007973  | N/A    | 0.25       |
| HP:0001274  | N/A    | 0.25       |
| HP:0002079  | N/A    | 0.25       |
| HP:0006891  | N/A    | 0.25       |
| HP:0002085  | N/A    | 0.24       |
| HP:0000252  | N/A    | 0.16       |
| HP:0000413  | N/A    | 0.075      |
| HP:0000485  | N/A    | 0.075      |
| HP:0000110  | N/A    | 0.075      |

OMIM: Disease ID: 236680, disease name: hydrolethalus syndrome 1, causative gene: HYLS1

| HPO Term ID | Gender | Penetrance |
|-------------|--------|------------|
| HP:0006882  | N/A    | 0.92       |
| HP:0001561  | N/A    | 0.92       |
| HP:0000568  | N/A    | 0.86       |
| HP:0001162  | N/A    | 0.77       |
| HP:0009752  | N/A    | 0.76       |
| HP:0000377  | N/A    | 0.7        |
| HP:0002777  | N/A    | 0.57       |
| HP:0008749  | N/A    | 0.57       |
| HP:0000175  | N/A    | 0.55       |
| HP:0001762  | N/A    | 0.52       |
| HP:0001674  | N/A    | 0.48       |
| HP:0001629  | N/A    | 0.48       |
| HP:0000047  | M      | 0.33       |
| HP:0000136  | F      | 0.33       |
| HP:0000126  | N/A    | 0.16       |

OMIM: Disease ID: 243800, disease name: johanson-blizzard syndrome, causative gene: UBR1

| HPO Term ID | Gender | Penetrance |
|-------------|--------|------------|
| HP:0002024  | N/A    | 1.0        |
| HP:0000430  | N/A    | 1.0        |
| HP:0002209  | N/A    | 0.96       |
| HP:0002236  | N/A    | 0.96       |
| HP:0006334  | N/A    | 0.9        |
| HP:0006349  | N/A    | 0.9        |
| HP:0001249  | N/A    | 0.67       |
| HP:0001545  | N/A    | 0.4        |
| HP:0000821  | N/A    | 0.3        |
| HP:0000126  | F      | 0.25       |
| HP:0001153  | F      | 0.25       |
| HP:0000126  | M      | 0.25       |
| HP:0000028  | M      | 0.25       |
| HP:0000054  | M      | 0.25       |
| HP:0000047  | M      | 0.25       |
| HP:0000143  | N/A    | 0.18       |
| HP:0000954  | N/A    | 0.075      |
| HP:0000819  | N/A    | 0.075      |
| HP:0002557  | N/A    | 0.075      |
| HP:0001362  | N/A    | 0.075      |
| HP:0000486  | N/A    | 0.075      |
| HP:0002253  | N/A    | 0.075      |
| HP:0003362  | N/A    | 0.075      |
| HP:0001696  | N/A    | 0.075      |
| HP:0000957  | N/A    | 0.075      |



OMIM: Disease ID: 265000, disease name: multiple pterygium syndrome, escobar variant, causative gene: CHRNG

| HPO Term ID | Gender | Penetrance |
|-------------|--------|------------|
| HP:0002650  | N/A    | 1.0        |
| HP:0001836  | N/A    | 1.0        |
| HP:0006446  | N/A    | 1.0        |
| HP:0005617  | N/A    | 1.0        |
| HP:0000508  | N/A    | 0.8181     |
| HP:0000494  | N/A    | 0.8181     |
| HP:0008729  | F      | 0.8        |
| HP:0002643  | N/A    | 0.7272     |
| HP:0001762  | N/A    | 0.7272     |
| HP:0002714  | N/A    | 0.7272     |
| HP:0002808  | N/A    | 0.7        |
| HP:0000028  | M      | 0.6666     |
| HP:0009759  | N/A    | 0.6363     |
| HP:0009756  | N/A    | 0.5454     |
| HP:0000286  | N/A    | 0.5454     |
| HP:0000160  | N/A    | 0.5        |
| HP:0000343  | N/A    | 0.4545     |
| HP:0003083  | N/A    | 0.4285     |
| HP:0001060  | N/A    | 0.3636     |
| HP:0002949  | N/A    | 0.3        |
| HP:0009761  | N/A    | 0.3        |
| HP:0009760  | N/A    | 0.2727     |
| HP:0000405  | N/A    | 0.2727     |
| HP:0000902  | N/A    | 0.2222     |
| HP:0009757  | N/A    | 0.1818     |
| HP:0000175  | N/A    | 0.1818     |

OMIM: Disease ID: 270400, disease name: smith-lemli-opitz syndrome, causative gene: DHCR7

| HPO Term ID | Gender | Penetrance |
|-------------|--------|------------|
| HP:0004691  | N/A    | 0.99       |
| HP:0001249  | N/A    | 0.9512     |
| HP:0000252  | N/A    | 0.8414     |
| HP:0001508  | N/A    | 0.8170     |
| HP:0000463  | N/A    | 0.75       |
| HP:0000508  | N/A    | 0.7012     |
| HP:0000343  | N/A    | 0.5        |
| HP:0002079  | N/A    | 0.5        |
| HP:0000047  | M      | 0.5        |
| HP:0007165  | N/A    | 0.5        |
| HP:0000187  | N/A    | 0.5        |
| HP:0001830  | N/A    | 0.4817     |
| HP:0001162  | N/A    | 0.4817     |
| HP:0000175  | N/A    | 0.4695     |
| HP:0000104  | N/A    | 0.33       |
| HP:0000518  | N/A    | 0.2195     |
| HP:0001631  | N/A    | 0.2        |
| HP:0001643  | N/A    | 0.18       |
| HP:0002021  | N/A    | 0.1402     |
| HP:0001629  | N/A    | 0.1        |
| HP:0000316  | N/A    | 0.075      |
| HP:0000286  | N/A    | 0.075      |

OMIM: Disease ID: 303600, disease name: coffin-lowry syndrome, causative gene: RPS6KA3

| HPO Term ID | Gender | Penetrance |
|-------------|--------|------------|
| HP:0001249  | N/A    | 1.0        |
| HP:0001169  | N/A    | 1.0        |
| HP:0001182  | N/A    | 1.0        |
| HP:0000445  | N/A    | 1.0        |
| HP:0009746  | N/A    | 1.0        |
| HP:0000316  | N/A    | 1.0        |
| HP:0000506  | N/A    | 1.0        |
| HP:0000280  | N/A    | 1.0        |
| HP:0006129  | N/A    | 0.96       |
| HP:0000954  | N/A    | 0.9411     |
| HP:0000494  | N/A    | 0.8518     |
| HP:0000767  | N/A    | 0.8        |
| HP:0000768  | N/A    | 0.8        |
| HP:0002750  | N/A    | 0.7894     |
| HP:0002684  | N/A    | 0.6363     |
| HP:0001250  | N/A    | 0.4705     |

OMIM: Disease ID: 305400, disease name: aarskog-scott syndrome, causative gene: FGD1

| HPO Term ID | Gender | Penetrance |
|-------------|--------|------------|
| HP:0000316  | N/A    | 0.89       |
| HP:0000289  | N/A    | 0.8461     |
| HP:0009748  | N/A    | 0.8252     |
| HP:0001174  | N/A    | 0.8181     |
| HP:0001156  | N/A    | 0.8181     |
| HP:0002055  | N/A    | 0.8080     |
| HP:0000327  | N/A    | 0.8076     |
| HP:0000463  | N/A    | 0.7924     |
| HP:0000049  | N/A    | 0.7708     |
| HP:0000349  | N/A    | 0.7647     |
| HP:0006158  | N/A    | 0.7540     |
| HP:0000954  | N/A    | 0.6909     |
| HP:0000431  | N/A    | 0.6666     |
| HP:0001544  | N/A    | 0.6666     |
| HP:0000028  | N/A    | 0.6382     |
| HP:0000023  | N/A    | 0.6170     |
| HP:0000494  | N/A    | 0.5308     |
| HP:0000508  | N/A    | 0.5061     |
| HP:0000767  | N/A    | 0.4594     |

OMIM: Disease ID: 305450, disease name: opitz-kaveggia syndrome, causative gene: MED12

| HPO Term ID | Gender | Penetrance |
|-------------|--------|------------|
| HP:0001249  | N/A    | 0.97       |
| HP:0002236  | N/A    | 0.91       |
| HP:0001270  | N/A    | 0.9        |
| HP:0000494  | N/A    | 0.85       |
| HP:0000316  | N/A    | 0.83       |
| HP:0005833  | N/A    | 0.81       |
| HP:0000260  | N/A    | 0.77       |
| HP:0005490  | N/A    | 0.74       |
| HP:0001250  | N/A    | 0.7        |
| HP:0002019  | N/A    | 0.69       |
| HP:0000954  | N/A    | 0.6        |
| HP:0000286  | N/A    | 0.56       |
| HP:0001159  | N/A    | 0.54       |
| HP:0000486  | N/A    | 0.52       |
| HP:0000179  | N/A    | 0.44       |
| HP:0002025  | N/A    | 0.38       |
| HP:0001150  | N/A    | 0.38       |
| HP:0001545  | N/A    | 0.38       |
| HP:0000028  | N/A    | 0.36       |
| HP:0000960  | N/A    | 0.25       |
| HP:0002828  | N/A    | 0.25       |
| HP:0009762  | N/A    | 0.25       |
| HP:0008070  | N/A    | 0.25       |
| HP:0002213  | N/A    | 0.25       |
| HP:0001620  | N/A    | 0.075      |
| HP:0001171  | N/A    | 0.075      |
| HP:0000470  | N/A    | 0.075      |
| HP:0000175  | N/A    | 0.075      |
| HP:0002021  | N/A    | 0.075      |

|            |     |       |
|------------|-----|-------|
| HP:0000453 | N/A | 0.075 |
| HP:0000047 | N/A | 0.075 |
