# Supplementary material for: Clinical phenotype-based gene prioritization: an initial study using semantic similarity and the human phenotype ontology
Source: Springer Nature journal article supplement (doi:10.1186/1471-2105-15-248), 2014-07-21
Supplement: 12859_2014_6518_MOESM3_ESM.pdf [file 12859_2014_6518_MOESM3_ESM.pdf]

Abnormality  
Higher Mental  
Function  
(0)

Cognitive  
Impairment  
(235)

Intellectual  
Disability  
(371)

Specific  
Learning  
Disability  
(371)

*GJB2*  
(57)

*USH2A*  
(253)
