# Supplementary material for: Clinical phenotype-based gene prioritization: an initial study using semantic similarity and the human phenotype ontology
Source: Springer Nature journal article supplement (doi:10.1186/1471-2105-15-248), 2014-07-21

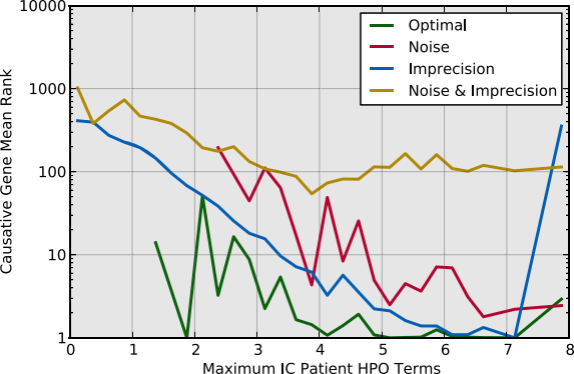

Supplement: 12859_2014_6518_MOESM7_ESM.pdf [file 12859_2014_6518_MOESM7_ESM.pdf]
